# Supplementary material
Source: publisher figshare collection journal article supplement (https://gsajournals.figshare.com/ndownloader/files/13669595)
Supplement: Supplementary file 1 [file 13669595]

## Sheet: Sheet1
Oligo name	Sequence	Purpose
GM156	(5’-CACCTCTCTCCGAAAAATTTAGCTGC-3’)	atf-8p promoter cloning
GM157	(5’-AATTTCAGATTTGTTGCGCTTT-3’)	atf-8p promoter cloning
GM126	(5’-GTTCACCGCAAGTGCTTCTAAATG-3’)	act-1 qPCR
GM127	(5’-GCAAATGAGTGAAAGGACAATAAGG-3’)	act-1 qPCR
GM152	(5’-CACCGCACCTTTGGTCTTTTATTGTC-3’)	eef-1A.1 promoter cloning
GM153	(5’-TGAGCAAAGTGTTTCCCAACTG-3’)	eef-1A.1 promoter cloning
GM132	(5’-CACCGCATTTCTTTTTCCATTAAAAAAGGC-3’)	egl-17p promoter cloning
GM133	(5’-AGCTCACATTTCGGGCACCTG-3’)	egl-17p promoter cloning
GM146	(5’-TGGAAGCGTTCAACTAGCAG-3’)	GFP qPCR
GM147	(5’-CTCAAGAAGGACCATGTGGTC-3’)	GFP qPCR
GM134	(5’-CACCATGCGGAAAATGCTACTTTTTTGC-3’)	lin-3c cDNA cloning
GM135	(5’-TCATGTGTGTCGAATCATTGG-3’)	lin-3c cDNA cloning
GM124	(5’-CGATGCTGAGGTGAAGACAA-3’)	mCherry qPCR
GM125	(5’-ACAAATCATCCATGCCACCT-3’)	mCherry qPCR
GM150	(5’-CACCATGCGCTTTGATTTCCAAAAC-3’)	peel-1 cloning
GM151	(5’-TCATGGATTTTCAACACTTGG-3’)	peel-1 cloning
GM144	(5’-CACCGCAATCAAATGCACTCTTGTTCTC-3’)	pro-1p promoter cloning
GM145	(5’-GGCGCGCCACCAAAAGTAGCTG-3’)	pro-1p promoter cloning
GM176	(5’-TATTAAGCGCGACTTCGGTTCCCT-3’)	sod-3 qPCR
GM177	(5’-CGTGCTCCCAAACGTCAATTCCAA-3’)	sod-3 qPCR
